# Supplementary material for: Six-Month Longitudinal Patterns of Mental Health Treatment Utilization by Older Adults With Depressive Symptoms
Source: Atypon-hosted journal article supplement (doi:10.1176/ps.62.11.pss6211_1353), 2011-11-01
Supplement: pss_62_11_1353_ds001.pdf [file pss_62_11_1353_ds001.pdf]

Appendix

Script for Depression Treatment Referrals

|                               | YES | NO |
|-------------------------------|-----|----|
| Score 5+ on the short GDS?    |     |    |
| Suicidal ideation?            |     |    |
| Request depression treatment? |     |    |

Were any *SHADED* boxes checked?  Yes  $\Rightarrow$  **MAKE REFERRAL**  
 No  $\Rightarrow$  **SKIP TO NEXT SECTION**

*Script for making the referral:*

You have [reported symptoms of depression / requested treatment for depression].

[*If prior referrals:* I previously referred you for depression services. Now]  
 I would like to refer you to (*same or different setting*):

*Provider name*

*Basic information about treatment modality (medications, counseling, etc.)*

*Contact information*

People with symptoms such as yours often improve with this type of treatment.  
 Do you have any questions? *Answer questions as appropriate.*

*Record referrals made and reasons for making them in the last section ("Interviewer Report").*
